# Supplementary material for: The Deubiquitinase USP47 Stabilizes MAPK by Counteracting the Function of the N-end Rule ligase POE/UBR4 in Drosophila
Source: PLoS Biol. 2016 Aug 23;14(8):e1002539. doi: 10.1371/journal.pbio.1002539 (PMC4994957; doi:10.1371/journal.pbio.1002539)
Supplement: S1 Data — (XLSX) [file pbio.1002539.s001.xlsx]

## Sheet: Fig 1B
assay	dsRNA	pMAPK signal	SD
RASV12	GFP	1	0.0315124
RASV12	cnk	0.282654	0.035656
RASV12	mapk	0.0944636	0.0240685
RASV12	mago	0.684664	0.0460102
RASV12	Usp47	0.679881	0.0375043
RAFCT	GFP	1	0.0401367
RAFCT	cnk	1.091	0.0721456
RAFCT	mapk	0.0356437	0.00895171
RAFCT	mago	0.361157	0.0546768
RAFCT	Usp47	0.599303	0.0285272
MEKEE	GFP	1	0.110561
MEKEE	cnk	1.28736	0.0788815
MEKEE	mapk	0.0545635	0.0193187
MEKEE	mago	0.658182	0.0780528
MEKEE	Usp47	0.590411	0.085029

## Sheet: Fig 1C
assay	dsRNA	pMAPK signal	SD
insulin	GFP	1	0.0365319
insulin	cnk	0.2194	0.0954808
insulin	mapk	0.0408274	0.0189046
insulin	mago	0.716026	0.0114211
insulin	Usp47	0.626657	0.0588014
EGFR	GFP	1	0.0282428
EGFR	cnk	0.620781	0.0858298
EGFR	mapk	0.140931	0.0803569
EGFR	mago	0.7211	0.0640643
EGFR	Usp47	0.693168	0.0448536
SEVS11	GFP	1	0.0589726
SEVS11	cnk	0.32987	0.0969902
SEVS11	mapk	0.0429209	0.0149849
SEVS11	mago	0.479999	0.0948774
SEVS11	Usp47	0.732545	0.0322452
RAC1V12	GFP	1	0.0359465
RAC1V12	cnk	0.781392	0.0843886
RAC1V12	mapk	1.0258	0.0306476
RAC1V12	mago	1.09103	0.0500679
RAC1V12	Usp47	1.09777	0.0717167

## Sheet: Fig 2A
quantified band	dsRNA	control used for normalization	normalized value	SD
MAPK	none	AKT	0.93907	0.0779838
MAPK	Rluc	AKT	1	0
MAPK	mapk	AKT	0.0743904	0.027313
MAPK	Usp47	AKT	0.533699	0.0743304
MAPK	eIF4AIII	AKT	0.522949	0.0756658
MAPK	none	ACTIN	1.00579	0.084794
MAPK	Rluc	ACTIN	1	0
MAPK	mapk	ACTIN	0.0804364	0.0305733
MAPK	Usp47	ACTIN	0.560103	0.0755263
MAPK	eIF4AIII	ACTIN	0.556096	0.0714943
MAPK	none	TUBULIN	0.969588	0.0532504
MAPK	Rluc	TUBULIN	1	0
MAPK	mapk	TUBULIN	0.0785999	0.0256766
MAPK	Usp47	TUBULIN	0.527637	0.0784372
MAPK	eIF4AIII	TUBULIN	0.509646	0.113267

## Sheet: Fig 2G
qPCR assay	dsRNA	RQ	fold change (log10)	SD
Act5C	GFP	1	0	0.0365486
Act5C	Usp47_(1)	0.9105	-0.04072	0.0277368
Act5C	Usp47_(2)	0.9194	-0.0364955	0.0192182
Act5C	none	0.8256	-0.0832303	0.0349545
RpL32	GFP	1	0	0.0365349
RpL32	Usp47_(1)	1.0983	0.040721	0.0277538
RpL32	Usp47_(2)	1.0876	0.0364692	0.0192301
RpL32	none	1.2112	0.0832159	0.0349517
mapk	GFP	1	0
mapk	Usp47_(1)	0.9367	-0.0283995	0.0709548
mapk	Usp47_(2)	0.8963	-0.0475466	0.068162
mapk	none	0.7355	-0.133417	0.167956
Usp47	GFP	1	0	0.0108719
Usp47	Usp47_(1)	0.3922	-0.406492	0.0678883
Usp47	Usp47_(2)	0.3977	-0.400444	0.043299
Usp47	none	1.0841	0.0350693	0.0395211

## Sheet: Fig 2H
qPCR assay	dsRNA	fraction	Ct	SD
Act5C	none	monosome	16.4137	1.07039
Act5C	Usp47	monosome	17.5563	0.344926
Act5C	none	polysome	14.2973	0.130467
Act5C	Usp47	polysome	14.7594	0.076409
RpL32	none	monosome	14.0676	0.296718
RpL32	Usp47	monosome	15.2944	0.421018
RpL32	none	polysome	15.0914	0.136188
RpL32	Usp47	polysome	15.4096	0.178466
mapk	none	monosome	23.5813	0.153447
mapk	Usp47	monosome	24.3174	0.39334
mapk	none	polysome	22.6403	0.271643
mapk	Usp47	polysome	22.6753	0.0897979
jnk	none	monosome	20.8271	0.388251
jnk	Usp47	monosome	21.4334	0.201398
jnk	none	polysome	20.9125	0.207728
jnk	Usp47	polysome	20.6576	0.281676
Usp47	none	monosome	23.1766	0.776997
Usp47	Usp47	monosome	27.2599	0.113675
Usp47	none	polysome	21.9934	0.208446
Usp47	Usp47	polysome	26.1255	0.140424
Akt	none	monosome	25.0111	0.859922
Akt	Usp47	monosome	25.8753	0.277775
Akt	none	polysome	22.7113	0.162276
Akt	Usp47	polysome	23.3353	0.0973557

## Sheet: Fig 3B
quantified band	dsRNA	time (h)	value normalized to lysate bands	SD
HA-MAPK	Rluc	0	1	0
HA-MAPK	Rluc	6	0.708272	0.0882324
HA-MAPK	Rluc	12	0.522036	0.0592149
HA-MAPK	Rluc	18	0.371442	0.000339412
HA-MAPK	Rluc	24	0.261516	0.0604504
HA-MAPK	Rluc	36	0.205096	0.116937
HA-MAPK	Usp47	0	1	0
HA-MAPK	Usp47	6	0.623988	0.0835062
HA-MAPK	Usp47	12	0.380035	0.105414
HA-MAPK	Usp47	18	0.188827	0.124586
HA-MAPK	Usp47	24	0.124016	0.12468
HA-MAPK	Usp47	36	0.144507	0.0132354

## Sheet: Fig 3C
quantified band	dsRNA	cell line	normalized value	SD
HA-MAPK	Rluc	HA-mapk	1	0
HA-MAPK	Usp47	HA-mapk	0.56785	0.08232
HA-MAPK	Rluc	HA-mapk_KextR	1	0
HA-MAPK	Usp47	HA-mapk_KextR	0.550811	0.11121
HA-MAPK	Rluc	HA-mapk_noK	1	0
HA-MAPK	Usp47	HA-mapk_noK	1.02522	0.0817227
endo. MAPK	Rluc	HA-mapk	1	0
endo. MAPK	Usp47	HA-mapk	0.55733	0.0773621
endo. MAPK	Rluc	HA-mapk_KextR	1	0
endo. MAPK	Usp47	HA-mapk_KextR	0.417766	0.115331
endo. MAPK	Rluc	HA-mapk_noK	1	0
endo. MAPK	Usp47	HA-mapk_noK	0.544848	0.128324

## Sheet: Fig 3D
quantified band	dsRNA	normalized value	SD
endo. MAPK	Rluc	1	0
endo. MAPK	mapk	0.0672067	0.0123268
endo. MAPK	mapk+Uba1	0.0512489	0.0291831
endo. MAPK	Usp47	0.498931	0.050992
endo. MAPK	Usp47+Uba1	0.880334	0.0154105

## Sheet: Fig 3E
quantified band	dsRNA	epoxomicin	normalized value	SD
endo. MAPK	Rluc	no	1	0
endo. MAPK	Rluc	yes	1.05931	0.0295582
endo. MAPK	mapk	no	0.150239	0.0240492
endo. MAPK	mapk	yes	0.133654	0.00753132
endo. MAPK	Usp47	no	0.448514	0.0784405
endo. MAPK	Usp47	yes	0.763146	0.061145

## Sheet: Fig 4A
dsRNA	MAPK levels normalized to GFP (log10)	SD
GFP	0	0.057655
Usp47	-0.21447	0.038205
GFP+Uba1	0.010857	0.066547
Usp47+Uba1	0.036478	0.050727

[truncated: 13 more sheets: Fig 5C, Fig 5F, Fig 5G, Fig 6A, Fig 6D, S2A Fig, S2C Fig, S2D Fig, S2E Fig, S2G Fig, S6B Fig, S6C Fig, S6D Fig]
