# Supplementary material for: The Deubiquitinase USP47 Stabilizes MAPK by Counteracting the Function of the N-end Rule ligase POE/UBR4 in Drosophila
Source: PLoS Biol. 2016 Aug 23;14(8):e1002539. doi: 10.1371/journal.pbio.1002539 (PMC4994957; doi:10.1371/journal.pbio.1002539)
Supplement: S6 Table — (XLSX) [file pbio.1002539.s017.xlsx]

## Sheet: UBR factors
dsRNA	UBR family gene ortholog	GFP dsRNA (MAPK levels)	Usp47 dsRNA (MAPK levels)	Δm	p-val. GFP dsRNA	p-val. Usp47 dsRNA	p-val Δm	GFP dsRNA (actin)	Usp47 dsRNA (actin)	GFP dsRNA (cell count)	Usp47 dsRNA (cell count)
GFP		-0.00539203	-0.262549	0.00219866	1	2.06625e-18	1	-0.00229754	0.0226177	-0.00386916	-0.0096719
Usp47		-0.318457	-0.305184	-0.26823	1.54383e-13	1.79568e-12	6.95529e-08	-0.0204857	0.00190407	0.0416748	0.0349326
Ubr1	UBR1/2	-0.00582168	-0.0227202	-0.286723	0.9904	0.626858	9.79503e-06	0.123498	0.135784	-0.719558	-0.731118
Ubr3	UBR3	-0.0160116	-0.33062	0.0109868	0.766304	1.50023e-10	0.876166	-0.0214739	-0.0191744	0.0412166	0.0422326
poe	UBR4	0.0272948	-0.0746398	-0.201687	0.365263	0.0586081	0.000845435	-0.0178373	-0.019782	0.0317016	0.0619242
hyd	UBR5	-0.125115	-0.507404	0.0786678	0.00204727	4.29086e-15	0.180631	0.0148288	0.0136204	-0.114742	-0.113628
FBXO11	UBR6	0.160035	-0.238244	0.094658	4.5074e-05	3.72726e-07	0.107916	0.164065	0.0745124	-0.969248	-1.24083
CG15141	UBR7	0.083234	-0.126728	-0.0936591	0.0177256	0.001807	0.0973103	0.0768674	0.0369802	-0.125213	-0.0582823

## Sheet: N-end rule
dsRNA	GFP dsRNA (MAPK levels)	Usp47 dsRNA (MAPK levels)	Δm	p-val. GFP dsRNA	p-val. Usp47 dsRNA	p-val Δm	GFP dsRNA (actin)	Usp47 dsRNA (actin)	GFP dsRNA (cell count)	Usp47 dsRNA (cell count)	Note
GFP	-0.00709609	-0.360596	0.0418323	1	0.0496903	1	-0.00901403	-0.101128	-0.0296004	0.0328726
Usp47	-0.360596	-0.274764	-0.406426	7.98391e-31	0.328444	3.53998e-14	-0.101128	-0.0584723	0.144242	-0.040386
CG10092	-0.116996	-0.395257	-0.0334077	0.010932	0.153281	0.0438454	-0.111189	-0.118193	0.165114	0.0555109	possible Arginine--tRNA ligase
CG8097	-0.102371	-0.400653	-0.0248117	0.051236	0.124531	0.117034	-0.129829	-0.131741	0.177734	0.0854173	possible Arginine--tRNA ligase
Aats-arg	0.105953	-0.310657	0.104941	0.00933677	0.796663	0.0907554	0.136755	-0.0212145	-0.357673	-0.127609	Arginine--tRNA ligase
Ate1	0.0335209	-0.374456	0.0963086	0.326203	0.307243	0.137829	0.0194092	-0.121849	-0.0802424	0.0600942	arginyltransferase
CG31851	-0.0893428	-0.339943	-0.061068	0.0506764	0.740686	0.00692674	-0.114864	-0.111046	0.162067	0.0562235	N-terminal acetyltransferase B complex catalytic subunit NAT3
CG31730	0.0325974	-0.412852	0.133782	0.336834	0.0763236	0.0154101	0.0255798	-0.126249	-0.106228	0.0729637	N-terminal acetyltransferase B complex catalytic subunit NAT3
CG14222	0.0964868	-0.360878	0.145697	0.0156524	0.451917	0.00663037	0.0948768	-0.114736	-0.225744	0.0588675	N-terminal acetyltransferase B complex catalytic subunit NAT3
CG7593	-0.104671	-0.411418	-0.00492086	0.0222212	0.0820457	0.201968	-0.114491	-0.125824	0.16427	0.0708605	Histone-specific N-acetyltransferase NAT4
CG32319	-0.125107	-0.392229	-0.0445466	0.00678114	0.171558	0.0229582	-0.122653	-0.115962	0.172461	0.0549349	N-alpha-acetyltransferase 30
CG11412	-0.0986117	-0.387084	-0.0231961	0.0311023	0.203115	0.0808783	-0.103248	-0.112007	0.141078	0.053564	N-alpha-acetyltransferase 30
Nat1	-0.043964	-0.298823	-0.0568088	0.376549	0.620471	0.00927672	-0.0784319	-0.0951334	0.106247	0.0169069	N-terminal acetyltransferase B complex catalytic subunit NAT3
tun	0.0697144	-0.337159	0.0952052	0.067648	0.783584	0.144995	0.0872004	-0.109283	-0.209988	0.0533335	Protein N-terminal glutamine amidohydrolase
Nos	-0.0426229	-0.361151	0.00685976	0.393754	0.450493	0.344889	-0.085891	-0.111213	0.126325	0.0471054	cysteine S-nitrosylation
SP2637	0.0717308	-0.358158	0.118221	0.060935	0.485207	0.0404408	0.0512105	-0.11249	-0.136633	0.0585226	Protein N-terminal asparagine amidohydrolase
CG13630	0.0651726	-0.326567	0.0800717	0.0843874	0.951442	0.293703	0.0353688	-0.111245	-0.126177	0.0627273	Methionine aminopeptidase 1
CG5188	0.0650941	-0.364527	0.117953	0.0844102	0.409273	0.041884	0.0401314	-0.127755	-0.138349	0.0742961	Methionine aminopeptidase 1
und	-0.106232	-0.369837	-0.0480628	0.0203478	0.353549	0.0171958	-0.102904	-0.105373	0.151029	0.0432159	Methionine aminopeptidase 2
CG10576	-0.0919006	-0.348047	-0.0555216	0.0444538	0.621965	0.0104366	-0.107993	-0.100116	0.133228	0.0286616	Probable metalloprotease involved in proper assembly of pre-ribosomal particles during the biogenesis of the 60S ribosomal subunit. Accompanies the pre-60S particles to the cytoplasm
CG1317	-0.0684142	-0.306895	-0.0731867	0.144886	0.743706	0.00407242	-0.0941755	-0.102937	0.127407	0.0288444	ERAD-associated E3 ubiquitin-protein ligase DOA10; also involved in N-end rule

## Sheet: autophagy
dsRNA	GFP dsRNA (MAPK levels)	Usp47 dsRNA (MAPK levels)	Δm	p-val. GFP dsRNA	p-val. Usp47 dsRNA	p-val Δm	GFP dsRNA (actin)	Usp47 dsRNA (actin)	GFP dsRNA (cell count)	Usp47 dsRNA (cell count)	Note
GFP	-0.00709609	-0.360596	0.0418323	1	0.0496903	1	-0.00901403	-0.101128	-0.0296004	0.0328726
Usp47	-0.360596	-0.274764	-0.406426	7.98391e-31	0.328444	3.53998e-14	-0.101128	-0.0584723	0.144242	-0.040386
Atg1	0.0680174	-0.297436	0.0537857	0.0743257	0.598304	0.742051	0.0676789	-0.0787542	-0.164736	0.0240149	serine/threonine protein kinase;cytoplasm to vacuole transport (Cvt)
Atg7	-0.0669157	-0.339635	-0.0389486	0.155909	0.748772	0.0362011	-0.0958853	-0.118066	0.134246	0.0294359	E1-like activating enzyme; cytoplasm to vacuole transport (Cvt)
CG6194	0.0191688	-0.193947	-0.0985526	0.524998	0.0115794	0.00043714	-0.0337014	-0.0575828	0.0556451	-0.0207419	cysteine protease required for autophagy
Atg18	-0.042488	-0.251188	-0.102968	0.392119	0.153382	0.000372618	-0.069555	-0.0939988	0.105807	0.061944	cytoplasm to vacuole transport (Cvt), pexophagy and autophagy; ATG9 trafficking
Atg8b	-0.0557308	-0.289651	-0.0777475	0.241503	0.495394	0.00202385	-0.0450138	-0.073098	0.0432251	-0.00798462	cytoplasm to vacuole transport (Cvt); autophagosomes formation

## Sheet: Hong et al. RAD6 interactors
dsRNA	Rluc dsRNA (MAPK levels)	Usp47 dsRNA (MAPK levels)	Δm	p-val. Rluc dsRNA	p-val. Usp47 dsRNA	p-val Δm	Rluc dsRNA (cell count)	Usp47 dsRNA (cell count)
Rluc	0	-0.205654	0	1	1	1	0	0
mapk	-1.44881	-1.81021	0.155744	1.21461e-65	5.59397e-58	0.0666503	0.0100136	0.0080689
Usp47	-0.208936	-0.233233	-0.181357	2.02061e-35	0.00220691	1.12936e-24	-0.00300216	-0.0027188
poe	-0.00251435	-0.0492501	-0.158918	0.771928	2.68626e-22	9.595e-17	-0.00266921	0.00298571
Aats-Gln-1	-0.0595299	-0.275547	0.0103631	0.000960286	0.000188293	0.60366	-0.0485824	-0.112101
Aats-Gln-2	-0.0471512	-0.186292	-0.0665135	0.00629804	0.243009	0.00391269	-0.0340704	-0.0215545
Aats-Glupro-1	-0.0353236	-0.286128	0.0451505	0.031509	6.98013e-05	0.0371456	-0.0240694	0.016555
Aats-Glupro-2	-0.0592368	-0.265158	0.000266958	0.000718991	0.0081204	0.610077	-0.0780879	-0.0106676
Aats-Ser-1	0.00899048	-0.192581	-0.00408294	0.553156	0.436817	0.891253	0.0255961	0.0175381
Aats-Ser-2	0.00424907	-0.218616	0.0172108	0.785373	0.371571	0.399396	0.0232742	0.0120573
Bre1-1	-0.00995891	-0.186429	-0.0291845	0.554163	0.214731	0.153811	-0.0783408	-0.075289
Bre1-2	0.00112372	-0.193063	-0.0114677	0.945167	0.424184	0.551511	-0.0170796	-0.0494351
CG11092-1	-0.0827517	-0.26981	-0.0185962	1.54565e-05	0.000187139	0.357108	0.0151621	-0.0234382
CG11092-2	-0.106736	-0.291168	-0.0212222	3.50323e-07	4.19502e-06	0.308731	-0.0269713	-0.0546917
CG13771-1	-0.0344118	-0.199517	-0.0405486	0.0431706	0.733743	0.0629377	0.0671024	0.0446552
CG13771-2	-0.00725643	-0.205769	-0.00714161	0.641553	0.940277	0.720287	0.0604772	0.0656065
CG1635-1	0.00699086	-0.262558	0.0638949	0.658719	0.00107474	0.00420459	0.0559315	0.0396261
CG1635-2	-0.00366288	-0.268872	0.059555	0.819201	0.000291451	0.00812611	0.0480209	0.0233623
CG1638-1	0.0142077	-0.250369	0.0589223	0.352421	0.00663683	0.00596128	0.052358	0.0647657
CG1638-2	0.00476892	-0.248191	0.0473055	0.753083	0.00977507	0.0250047	0.018362	0.0609549
CG1774-1	-0.0405569	-0.235213	-0.0109978	0.018192	0.0544428	0.578157	0.0568462	0.0534738
CG1774-2	-0.0371446	-0.224704	-0.0180949	0.0302338	0.193722	0.376507	0.0749282	0.0685654
CG2493-1	-0.00648255	-0.233422	0.0212852	0.671572	0.106537	0.325209	-0.0271543	0.0292361
CG2493-2	-0.00615213	-0.233262	0.0214554	0.686861	0.116464	0.27783	-0.0282854	0.014508
CG7262-1	-0.0395261	-0.192213	-0.0529672	0.0235061	0.418978	0.0160602	0.00164671	0.00813303
CG7262-2	-0.0602524	-0.205571	-0.0603355	0.000630946	0.953483	0.00847457	-0.0158957	-0.0156249
CG8771-1	-0.140806	-0.308081	-0.0383785	1.12254e-09	2.26037e-07	0.0724675	-0.195628	-0.121176
CG8771-2	-0.158755	-0.316372	-0.0480369	1.99831e-10	5.99575e-08	0.0274263	-0.182509	-0.113986
CG8949-1	-0.0263216	-0.18704	-0.0449362	0.110417	0.221414	0.0327759	-0.0476768	-0.0644033
CG8949-2	-0.0362711	-0.208044	-0.0338816	0.0349875	0.819192	0.0955229	-0.0183435	-0.0517642
mtSSB-1	0.0213565	-0.184148	-0.000149435	0.153239	0.177259	0.969078	0.0411895	0.0624931
mtSSB-2	0.0278906	-0.192678	0.0149147	0.0723745	0.415481	0.486271	0.0483419	0.041871
NIPSNAP-2	0.0318214	-0.184651	0.0108181	0.0377056	0.211008	0.561196	0.0410957	0.060348
NUP214-1	-0.0586403	-0.324233	0.0599381	0.000939849	9.67116e-08	0.0129713	-0.0520798	-0.030145
NUP214-2	-0.0537294	-0.313565	0.0541818	0.00174922	5.30243e-07	0.0192629	-0.0484067	-0.0400309
Slimp-1	-0.0036971	-0.259024	0.0496723	0.812353	0.00208472	0.0195786	0.0585024	0.0533504
Slimp-2	0.00185641	-0.267615	0.0638174	0.903081	0.000395046	0.00321268	0.0524364	0.0275549
sxc-1	-0.0662911	-0.218791	-0.0531542	0.000444259	0.344504	0.0147674	0.0359979	0.0327776
sxc-2	-0.0561866	-0.193251	-0.0685899	0.00137457	0.441928	0.00208723	0.0148773	0.00784883

## Sheet: description
Additional RNAi experiment data
For all experiments shown here, MAPK levels, Δm, actin levels and cell count are log10 normalized values. All values shown here are normalized to either GFP or Rluc dsRNA treated controls. P-values shown are for a Student’s t-test comparing the experimental result to those of GFP/Rluc dsRNA or Usp47 control samples (as indicated). Note that Usp47 has a negative Δm because the dsRNA essentially ac…
UBR family: Results from the UBR family factor RNAi co-depletion experiment. dsRNAs used were different from those used in the primary screen.
N-end rule: Bona fide and predicted N-end rule factors were tested in co-depletion with Usp47 using distinct dsRNAs from the primary screen. Factors tested cover both the acetylation and arginylation branches of the N-end rule pathway.
Autophagy: Autophagy factors were tested in co-depletion with Usp47 using distinct dsRNAs from the primary screen.
RAD6 interactors: The orthologs of recently identified RAD6 interacting proteins (Hong, Kaustov et al. 2015) were tested for their ability to rescue Usp47 dsRNA.
